# Supplementary material for: Role of a respiratory burst oxidase of Lepidium sativum (cress) seedlings in root development and auxin signalling
Source: PubMed Central journal article supplement — J Exp Bot. 2012 Oct 23;63(18):6325–34. doi: 10.1093/jxb/ers284 (PMC3504488; doi:10.1093/jxb/ers284), 2012-10-23
Supplement: supp_ers284_jexbot085332_file001.pdf [file supp_ers284_jexbot085332_file001.pdf]

# **Role of a Respiratory Burst Oxidase of *Lepidium sativum* (Cress) Seedlings in Root Development and Auxin Signaling**

Kerstin Müller<sup>1\*</sup>, Ada Linkies<sup>2\*</sup>, Gerhard Leubner-Metzger<sup>2,3</sup>, and Allison R. Kermode<sup>1,4</sup>

<sup>1</sup>Simon Fraser University, Department of Biological Sciences, 8888 University Drive, Burnaby BC V5A 1S6, Canada

<sup>2</sup>Albert-Ludwigs-University, Institute for Biology II, Faculty of Biology, University of Freiburg, Schänzlestr. 1, 79104, Freiburg, Germany

<sup>3</sup>Royal Holloway, University of London, School of Biological Sciences, Egham, Surrey, TW20, 0ZX, UK

\*Authors contributed equally to this work

<sup>4</sup>Author for correspondence: kermode@sfu.ca; Tel +1-778-782-3982; Fax 778-782-3496

**Supplementary Data**

**Supplementary Figure S1. Alignment of the deduced amino acid sequences of the AtrbohB and LesarbohB cDNAs.** Alignment of the AtrbohB amino acid sequence with that of its putative ortholog LesarbohB. EF hand, transmembrane and NOX/Duox like FAD/NADP binding domains of the two plant species were determined with the algorithm DELTA-BLAST (Domain Enhanced Lookup Time Accelerated BLAST) and are indicated in the alignment. Note that the amino acids are missing at the LesarbohB termini due to missing bases in the sequencing. Green fillings in the top panel and black fillings in the sequences represent identical amino acids between both sequences. The top panel with green filling also shows amino acid numbers.

**Supplementary Figure S2. Alignment of the deduced amino acid sequences of the AtrbohF and LesarbohF cDNAs.** Alignment of the AtrbohF amino acid sequence with that of its putative ortholog LesarbohF. EF hand, transmembrane and NOX/Duox like FAD/NADP binding domains of the two plant species were determined with the algorithm DELTA-BLAST (Domain Enhanced Lookup Time Accelerated BLAST) and are indicated in the alignment. Green fillings in the top panel and black fillings in the sequences represent identical amino acids between both sequences. The top panel with green filling also shows amino acid numbers.

|                    |                                                                                                          |
|--------------------|----------------------------------------------------------------------------------------------------------|
| Consensus Identity | 1<br>X X X X X X X X X X X X X X X X X X X R C K A T G S X N X X E D X V E I T L E X R D                 |
| 1. LesarbohB       | 1 20 30 40<br>R C K A T G S H N S E E D C V E I T L E A R D                                              |
| 2. AtrbohB         | 1 10 20 30 40<br>M R E E E M E S S S E G E T N K I S R C K A T G S D N P D E D E Y V E I T L E V R D     |
| Consensus Identity | E X I X T M K X X A X L R S V X S G R L K T M V K S X S F A S R X L D R S K S X G                        |
| 1. LesarbohB       | 32 42 52 62<br>E S I S T M K S R A A L R S V V S G R L K T M V K S M S F A S R K L D R S K S S G         |
| 2. AtrbohB         | 50 60 70 80<br>E T I N T M K A K A T L R S V L S G R L K T M V K S L S F A S R R L D R S K S F G         |
| Consensus Identity | A X F A L R G L R F X A K N D A V G R G W D E V A X R X D X L A X X G K L P K S K                        |
| 1. LesarbohB       | 72 82 92 102<br>A I F A L R G L R F T A K N D A V G R G W D E V A K R L D E L A I G G K L P K S K        |
| 2. AtrbohB         | 90 100 110 120<br>A M F A L R G L R F I A K N D A V G R G W D E V A M R F D K L A V E G K L P K S K      |
| Consensus Identity | F G X C I G M X E S S E F V N E L X E A L V R R R G T T S S S I T K T E L X E F W                        |
| 1. LesarbohB       | 112 122 132 142<br>F G R C I G M A E S S E F V N E L Y E A L V R R R G T T S S S I T K T E L S E F W     |
| 2. AtrbohB         | 130 140 150 160<br>F G H C I G M V E S S E F V N E L F E A L V R R R G T T S S S I T K T E L F E F W     |
| Consensus Identity | E O I T G N S F D X R L O I F F D M V D K N L D G R I T G D E V K E I I A L S A S                        |
| 1. LesarbohB       | 152 162 172 182<br>E O I T G N S F D A R L O I F F D M V D K N L D G R I T G D E V K E I I A L S A S     |
| 2. AtrbohB         | 170 180 190 200<br>E O I T G N S F D D R L O I F F D M V D K N L D G R I T G D E V K E I I A L S A S     |
| Consensus Identity | A N K L S K I K E N V D E Y X A L I M E E L D X D N L G Y I E L H N L E T L L L O                        |
| 1. LesarbohB       | 192 202 212 222<br>A N K L S K I K E N V D E Y V A L I M E E L D P D N L G Y I E L H N L E T L L L O     |
| 2. AtrbohB         | 210 220 230 240<br>A N K L S K I K E N V D E Y A A L I M E E L D R D N L G Y I E L H N L E T L L L O     |
| Consensus Identity | V P S Q S N X N S P S S A N K R A L N K M L S O K L I P T K D R N P V K R X A X N                        |
| 1. LesarbohB       | 232 242 252 262<br>V P S Q S N D N S P S S A N K R A L N K M L S O K L I P T K D R N P V K R Y A R N     |
| 2. AtrbohB         | 250 260 270 280<br>V P S Q S N - N S P S S A N K R A L N K M L S O K L I P T K D R N P V K R F A M N     |
| Consensus Identity | X S Y F X L E N W X R I W V L T L W J S I C X X L F T W K F J O Y X R X T V F E V                        |
| 1. LesarbohB       | 272 282 292 302<br>V S Y F L L E N W Q R I W V L T L W L S I C V A L F T W K F I O Y R R R T V F E V     |
| 2. AtrbohB         | 289 299 309 319<br>I S Y F F L E N W K R I W V L T L W I S I C I T L F T W K F L O Y K R K T V F E V     |
| Consensus Identity | X G Y C V X V A K G S A E T L K F N M A L I L L P V C R N T I T W L R T X S K J X                        |
| 1. LesarbohB       | 312 322 332 342<br>L G Y C V S V A K G S A E T L K F N M A L I L L P V C R N T I T W L R T N S K I V     |
| 2. AtrbohB         | 329 339 349 359<br>M G Y C V T V A K G S A E T L K F N M A L I L L P V C R N T I T W L R T K S K L I     |
| Consensus Identity | G S V V P F D D N I N F H K V X A F G I A V G X X L H X I S H L A C D F P R L L H                        |
| 1. LesarbohB       | 352 362 372 382 392<br>G S V V P F D D N I N F H K V I A F G I A V G V I L H S I S H L A C D F P R L L H |
| 2. AtrbohB         | 369 379 389 399 409<br>G S V V P F D D N I N F H K V V A F G I A V G I G L H A I S H L A C D F P R L L H |
| Consensus Identity | A K N V X X E P X K X F F G X E R P X N Y G W F M K G X D G W T G V X M V V L M L                        |
| 1. LesarbohB       | 402 412 422 432<br>A K N V A Y E P I K R F F G E E R P D N Y G W F M K G I D G W T G V I M V V L M L     |
| 2. AtrbohB         | 419 429 439 449<br>A K N V E F E P M K K F F G D E R P E N Y G W F M K G T D G W T G V T M V V L M L     |
| Consensus Identity | V A Y V L A Q S W F X R N R A N L P K S X K R L X G F N A F W Y S H H L F V I V Y                        |
| 1. LesarbohB       | 442 452 462 472<br>V A Y V L A Q S W F G R N R A N L P K S V K R L I G F N A F W Y S H H L F V I V Y     |
| 2. AtrbohB         | 459 469 479 489<br>V A Y V L A Q S W F R R N R A N L P K S L K R L T G F N A F W Y S H H L F V I V Y     |
| Consensus Identity | V L L I V H G Y F X Y L S K E W Y H K T T W M Y L A V P V L L Y A X E R L I R A F                        |
| 1. LesarbohB       | 482 492 502 512<br>V L L I V H G Y F I Y L S K E W Y H K T T W M Y L A V P V L L Y A C E R L I R A F     |
| 2. AtrbohB         | 499 509 519 529<br>V L L I V H G Y F V Y L S K E W Y H K T T W M Y L A V P V L L Y A F E R L I R A F     |
| Consensus Identity | R P G X K A V X V L K V A V Y P G N V L S L Y M S K P K G F K Y T S G O Y I Y X N                        |
| 1. LesarbohB       | 522 532 542 552<br>R P G S K A V R V L K V A V Y P G N V L S L Y M S K P K G F K Y T S G O Y I Y V N     |
| 2. AtrbohB         | 539 549 559 569<br>R P G A K A V K V L K V A V Y P G N V L S L Y M S K P K G F K Y T S G O Y I Y I N     |
| Consensus Identity | C S D V S P X Q W H P F S I T S A S G D D Y L S X H I R T L G D W T S O L K S L X                        |
| 1. LesarbohB       | 562 572 582 592<br>C S D V S P F Q W H P F S I T S A S G D D Y L S I H I R T L G D W T S O L K S L F     |
| 2. AtrbohB         | 579 589 599 609<br>C S D V S P L Q W H P F S I T S A S G D D Y L S V H I R T L G D W T S O L K S L Y     |
| Consensus Identity | S K V C O L X S X S O S G L F X X X X X X A N B I T R F P R L L I D G P Y G A P A                        |
| 1. LesarbohB       | 602 612 617 627<br>S K V C O ? L S R S O S G L F M - - - - - A N D I T R F P R L L I D G P Y G A P A     |
| 2. AtrbohB         | 619 629 639 649<br>S K V C O L P S T S O S G L F I A D I G Q A N N I T R F P R L L I D G P Y G A P A     |
| Consensus Identity | Q D Y R N Y B V L L L V G L G I G A T P L I S I R D V L N X I K N Q X S I E X X                          |
| 1. LesarbohB       | 637 647 657 667<br>Q D Y R N Y N V L L L V G L G I G A T P L I S I R D V L N I I K N Q K S I E Q N       |
| 2. AtrbohB         | 659 669 679 689<br>Q D Y R N Y D V L L L V G L G I G A T P L I S I R D V L N N I K N Q N S I E R G       |
| Consensus Identity | T N X H X X X X K X Y V A T K R A Y F Y W V T R E O G S L E W F S Z V M N E V A E                        |
| 1. LesarbohB       | 677 687 697 707<br>T N N H N V S T K S Y V A T K R A Y F Y W V T R E O G S L E W F S Q V M N E V A E     |
| 2. AtrbohB         | 699 706 716 726<br>T N Q H - - - I K N Y V A T K R A Y F Y W V T R E O G S L E W F S E V M N E V A E     |
| Consensus Identity | Y D S E G M I E L H N Y C T S V Y E E G D A R S A L I T M L O S L H H A K S G I D                        |
| 1. LesarbohB       | 717 727 737 747<br>Y D S E G M I E L H N Y C T S V Y E E G D A R S A L I T M L O S L H H A K S G I D     |
| 2. AtrbohB         | 736 746 756 766<br>Y D S E G M I E L H N Y C T S V Y E E G D A R S A L I T M L O S L H H A K S G I D     |
| Consensus Identity | I V S G T R V R T H F A R P B W R S V F K H V A V N H V N Q R V G V F Y C G N X C                        |
| 1. LesarbohB       | 757 767 777 787 797<br>I V S G T R V R T H F A R P D W R S V F K H V A V N H V N Q R V G V F Y C G N A C |
| 2. AtrbohB         | 776 786 796 806 816<br>I V S G T R V R T H F A R P N W R S V F K H V A V N H V N Q R V G V F Y C G N T C |
| Consensus Identity | J I X E L K R L A O D F S X X X X X X X X X X X X                                                        |
| 1. LesarbohB       | 810<br>L I A E L K R L A O D F S                                                                         |
| 2. AtrbohB         | 826 843<br>I I G E L K R L A O D F S R K T T T K F E F H K E N F                                         |

|              |                                                                                                                                                                                                                                                                                                                                                   |     |     |     |     |     |
|--------------|---------------------------------------------------------------------------------------------------------------------------------------------------------------------------------------------------------------------------------------------------------------------------------------------------------------------------------------------------|-----|-----|-----|-----|-----|
| Consensus    | 1                                                                                                                                                                                                                                                                                                                                                 | 10  | 20  | 30  | 40  | 50  |
| Identity     | <b>M</b> X <b>P</b> F <b>S</b> K <b>X</b> D <b>R</b> R <b>R</b> W <b>S</b> F <b>D</b> S <b>V</b> S <b>A</b> <b>X</b> <b>X</b> <b>X</b> A <b>X</b> G <b>S</b> A <b>S</b> T <b>S</b> P <b>G</b> T <b>E</b> Y <b>S</b> <b>X</b> <b>X</b> G <b>X</b> <b>X</b> Z <b>E</b> F <b>V</b> E <b>V</b> T <b>I</b> D <b>L</b> O <b>D</b> D <b>D</b> T <b>I</b> |     |     |     |     |     |
| 1. AtrbohF   | <b>M</b> K <b>P</b> F <b>S</b> K <b>N</b> D <b>R</b> R <b>R</b> W <b>S</b> F <b>D</b> S <b>V</b> S <b>A</b> G <b>K</b> T <b>A</b> V <b>G</b> S <b>A</b> S <b>T</b> S <b>P</b> G <b>T</b> E <b>Y</b> S <b>I</b> N <b>G</b> - <b>D</b> <b>Q</b> E <b>F</b> V <b>E</b> V <b>T</b> I <b>D</b> L <b>O</b> D <b>D</b> D <b>T</b> I                      |     |     |     |     |     |
| 2. LesarbohF | <b>M</b> R <b>P</b> F <b>S</b> K <b>H</b> D <b>R</b> R <b>R</b> W <b>S</b> F <b>D</b> S <b>V</b> S <b>A</b> E <b>R</b> N <b>A</b> I <b>G</b> S <b>A</b> S <b>T</b> S <b>P</b> G <b>T</b> E <b>Y</b> S <b>N</b> G <b>Y</b> G <b>E</b> E <b>F</b> V <b>E</b> V <b>T</b> I <b>D</b> L <b>O</b> D <b>D</b> D <b>T</b> I                               |     |     |     |     |     |
| Consensus    | 60                                                                                                                                                                                                                                                                                                                                                | 70  | 80  | 90  | 100 | 110 |
| Identity     | <b>V</b> L <b>R</b> S <b>V</b> E <b>P</b> A <b>T</b> A <b>I</b> N <b>V</b> <b>X</b> <b>X</b> D <b>I</b> S <b>D</b> <b>X</b> <b>X</b> <b>X</b> <b>X</b> <b>X</b> <b>X</b> G <b>X</b> M <b>T</b> P <b>V</b> S <b>I</b> S <b>R</b> S <b>P</b> T <b>M</b> K <b>R</b> T <b>S</b> S <b>N</b> R <b>X</b> R <b>O</b> F <b>S</b> O <b>E</b> L <b>K</b>     |     |     |     |     |     |
| 1. AtrbohF   | <b>V</b> L <b>R</b> S <b>V</b> E <b>P</b> A <b>T</b> A <b>I</b> N <b>V</b> I <b>G</b> D <b>I</b> S <b>D</b> D <b>N</b> T <b>-</b> <b>-</b> <b>-</b> <b>-</b> <b>-</b> G <b>I</b> M <b>T</b> P <b>V</b> S <b>I</b> S <b>R</b> S <b>P</b> T <b>M</b> K <b>R</b> T <b>S</b> S <b>N</b> R <b>F</b> R <b>O</b> F <b>S</b> O <b>E</b> L <b>K</b>        |     |     |     |     |     |
| 2. LesarbohF | <b>V</b> L <b>R</b> S <b>V</b> E <b>P</b> A <b>T</b> A <b>I</b> N <b>V</b> - <b>-</b> D <b>I</b> S <b>D</b> E <b>T</b> A <b>S</b> T <b>A</b> G <b>G</b> M <b>M</b> T <b>P</b> V <b>S</b> I <b>S</b> R <b>S</b> P <b>T</b> M <b>K</b> R <b>T</b> S <b>S</b> N <b>R</b> L <b>R</b> O <b>F</b> S <b>O</b> E <b>L</b> K                               |     |     |     |     |     |
| Consensus    | 120                                                                                                                                                                                                                                                                                                                                               | 130 | 140 | 150 | 160 | 170 |
| Identity     | <b>A</b> E <b>A</b> V <b>A</b> K <b>A</b> K <b>O</b> L <b>S</b> O <b>E</b> L <b>K</b> R <b>F</b> S <b>W</b> S <b>R</b> S <b>F</b> S <b>G</b> <b>X</b> L <b>T</b> T <b>T</b> <b>X</b> <b>X</b> <b>X</b> <b>X</b> <b>O</b> <b>X</b> G <b>G</b> <b>X</b> G <b>G</b> L <b>V</b> N <b>S</b> A <b>L</b> E <b>A</b> R <b>A</b> L <b>R</b> K <b>O</b>     |     |     |     |     |     |
| 1. AtrbohF   | <b>A</b> E <b>A</b> V <b>A</b> K <b>A</b> K <b>O</b> L <b>S</b> O <b>E</b> L <b>K</b> R <b>F</b> S <b>W</b> S <b>R</b> S <b>F</b> S <b>G</b> N <b>L</b> T <b>T</b> T <b>T</b> S <b>T</b> A <b>N</b> O <b>S</b> G <b>G</b> A <b>G</b> G <b>G</b> L <b>V</b> N <b>S</b> A <b>L</b> E <b>A</b> R <b>A</b> L <b>R</b> K <b>O</b>                      |     |     |     |     |     |
| 2. LesarbohF | <b>A</b> E <b>A</b> V <b>A</b> K <b>A</b> K <b>O</b> L <b>S</b> O <b>E</b> L <b>K</b> R <b>F</b> S <b>W</b> S <b>R</b> S <b>F</b> S <b>G</b> T <b>L</b> T <b>T</b> T <b>N</b> - <b>-</b> <b>H</b> O <b>N</b> G <b>G</b> - <b>-</b> G <b>G</b> L <b>V</b> N <b>S</b> A <b>L</b> E <b>A</b> R <b>A</b> L <b>R</b> K <b>O</b>                        |     |     |     |     |     |
| Consensus    | 180                                                                                                                                                                                                                                                                                                                                               | 190 | 200 | 210 | 220 |     |
| Identity     | <b>R</b> A <b>O</b> L <b>D</b> R <b>T</b> R <b>S</b> S <b>A</b> O <b>R</b> A <b>L</b> R <b>G</b> L <b>R</b> F <b>I</b> S <b>N</b> K <b>X</b> <b>X</b> <b>N</b> <b>X</b> D <b>G</b> W <b>N</b> D <b>V</b> O <b>S</b> N <b>F</b> E <b>K</b> <b>X</b> <b>X</b> K <b>N</b> G <b>Y</b> I <b>R</b> S <b>D</b> F <b>A</b> O <b>C</b> I <b>G</b>          |     |     |     |     |     |
| 1. AtrbohF   | <b>R</b> A <b>O</b> L <b>D</b> R <b>T</b> R <b>S</b> S <b>A</b> O <b>R</b> A <b>L</b> R <b>G</b> L <b>R</b> F <b>I</b> S <b>N</b> K <b>Q</b> K <b>N</b> V <b>D</b> G <b>W</b> N <b>D</b> V <b>O</b> S <b>N</b> F <b>E</b> K <b>F</b> E <b>K</b> N <b>G</b> Y <b>I</b> R <b>S</b> D <b>F</b> A <b>O</b> C <b>I</b> G                               |     |     |     |     |     |
| 2. LesarbohF | <b>R</b> A <b>O</b> L <b>D</b> R <b>T</b> R <b>S</b> S <b>A</b> O <b>R</b> A <b>L</b> R <b>G</b> L <b>R</b> F <b>I</b> S <b>N</b> K <b>R</b> T <b>N</b> F <b>D</b> G <b>W</b> N <b>D</b> V <b>O</b> S <b>N</b> F <b>E</b> K <b>L</b> S <b>K</b> N <b>G</b> Y <b>I</b> R <b>S</b> D <b>F</b> A <b>O</b> C <b>I</b> G                               |     |     |     |     |     |
| Consensus    | 230                                                                                                                                                                                                                                                                                                                                               | 240 | 250 | 260 | 270 | 280 |
| Identity     | <b>M</b> K <b>D</b> S <b>X</b> E <b>F</b> A <b>L</b> E <b>L</b> F <b>D</b> A <b>L</b> S <b>R</b> R <b>R</b> <b>X</b> <b>X</b> V <b>E</b> K <b>I</b> N <b>H</b> D <b>E</b> L <b>Y</b> E <b>Y</b> W <b>S</b> O <b>I</b> N <b>D</b> E <b>S</b> F <b>D</b> S <b>R</b> L <b>O</b> I <b>F</b> F <b>D</b> I <b>V</b> D <b>K</b> N                        |     |     |     |     |     |
| 1. AtrbohF   | <b>M</b> K <b>D</b> S <b>K</b> E <b>F</b> A <b>L</b> E <b>L</b> F <b>D</b> A <b>L</b> S <b>R</b> R <b>R</b> R <b>L</b> K <b>V</b> E <b>K</b> I <b>N</b> H <b>D</b> E <b>L</b> Y <b>E</b> Y <b>W</b> S <b>O</b> I <b>N</b> D <b>E</b> S <b>F</b> D <b>S</b> R <b>L</b> O <b>I</b> F <b>F</b> D <b>I</b> V <b>D</b> K <b>N</b>                      |     |     |     |     |     |
| 2. LesarbohF | <b>M</b> K <b>D</b> S <b>N</b> E <b>F</b> A <b>L</b> E <b>L</b> F <b>D</b> A <b>L</b> S <b>R</b> R <b>R</b> R <b>Q</b> R <b>V</b> E <b>K</b> I <b>N</b> H <b>D</b> E <b>L</b> Y <b>E</b> Y <b>W</b> S <b>O</b> I <b>N</b> D <b>E</b> S <b>F</b> D <b>S</b> R <b>L</b> O <b>I</b> F <b>F</b> D <b>I</b> V <b>D</b> K <b>N</b>                      |     |     |     |     |     |
| Consensus    | 290                                                                                                                                                                                                                                                                                                                                               | 300 | 310 | 320 | 330 | 340 |
| Identity     | <b>E</b> D <b>G</b> R <b>I</b> T <b>E</b> E <b>V</b> <b>X</b> E <b>I</b> I <b>M</b> L <b>S</b> A <b>S</b> A <b>N</b> K <b>L</b> S <b>R</b> L <b>K</b> <b>X</b> O <b>A</b> E <b>E</b> Y <b>A</b> A <b>L</b> I <b>M</b> E <b>E</b> L <b>D</b> P <b>E</b> R <b>L</b> G <b>Y</b> I <b>E</b> L <b>W</b> O <b>L</b> E <b>T</b> L                        |     |     |     |     |     |
| 1. AtrbohF   | <b>E</b> D <b>G</b> R <b>I</b> T <b>E</b> E <b>V</b> <b>K</b> E <b>I</b> I <b>M</b> L <b>S</b> A <b>S</b> A <b>N</b> K <b>L</b> S <b>R</b> L <b>K</b> E <b>O</b> A <b>E</b> E <b>Y</b> A <b>A</b> L <b>I</b> M <b>E</b> E <b>L</b> D <b>P</b> E <b>R</b> L <b>G</b> Y <b>I</b> E <b>L</b> W <b>O</b> L <b>E</b> T <b>L</b>                        |     |     |     |     |     |
| 2. LesarbohF | <b>E</b> D <b>G</b> R <b>I</b> T <b>E</b> E <b>V</b> <b>Q</b> E <b>I</b> I <b>M</b> L <b>S</b> A <b>S</b> A <b>N</b> K <b>L</b> S <b>R</b> L <b>K</b> <b>D</b> O <b>A</b> E <b>E</b> Y <b>A</b> A <b>L</b> I <b>M</b> E <b>E</b> L <b>D</b> P <b>E</b> R <b>L</b> G <b>Y</b> I <b>E</b> L <b>W</b> O <b>L</b> E <b>T</b> L                        |     |     |     |     |     |
| Consensus    | 350                                                                                                                                                                                                                                                                                                                                               | 360 | 370 | 380 | 390 |     |
| Identity     | <b>L</b> L <b>O</b> K <b>D</b> T <b>Y</b> L <b>N</b> Y <b>S</b> O <b>A</b> L <b>S</b> Y <b>T</b> S <b>O</b> A <b>L</b> S <b>O</b> N <b>I</b> <b>X</b> G <b>L</b> R <b>X</b> <b>X</b> S <b>R</b> I <b>H</b> R <b>M</b> S <b>S</b> D <b>X</b> V <b>Y</b> <b>X</b> <b>X</b> O <b>E</b> N <b>W</b> K <b>R</b> I <b>W</b> V <b>I</b> <b>X</b> I        |     |     |     |     |     |
| 1. AtrbohF   | <b>L</b> L <b>O</b> K <b>D</b> T <b>Y</b> L <b>N</b> Y <b>S</b> O <b>A</b> L <b>S</b> Y <b>T</b> S <b>O</b> A <b>L</b> S <b>O</b> N <b>L</b> <b>Q</b> G <b>L</b> R <b>G</b> K <b>S</b> R <b>I</b> H <b>R</b> M <b>S</b> S <b>D</b> F <b>V</b> Y <b>I</b> M <b>O</b> E <b>N</b> W <b>K</b> R <b>I</b> W <b>V</b> I <b>S</b> I                      |     |     |     |     |     |
| 2. LesarbohF | <b>L</b> L <b>O</b> K <b>D</b> T <b>Y</b> L <b>N</b> Y <b>S</b> O <b>A</b> L <b>S</b> Y <b>T</b> S <b>O</b> A <b>L</b> S <b>O</b> N <b>L</b> H <b>G</b> L <b>R</b> <b>Q</b> N <b>S</b> R <b>I</b> H <b>R</b> M <b>S</b> S <b>D</b> C <b>V</b> Y <b>F</b> I <b>O</b> E <b>N</b> W <b>K</b> R <b>I</b> W <b>V</b> I <b>F</b> I                      |     |     |     |     |     |
| Consensus    | 400                                                                                                                                                                                                                                                                                                                                               | 410 | 420 | 430 | 440 | 450 |
| Identity     | <b>W</b> <b>X</b> M <b>I</b> M <b>J</b> G <b>L</b> F <b>L</b> W <b>K</b> F <b>F</b> O <b>Y</b> K <b>O</b> K <b>D</b> A <b>F</b> H <b>V</b> M <b>G</b> Y <b>C</b> L <b>L</b> T <b>A</b> K <b>G</b> A <b>E</b> T <b>L</b> K <b>F</b> N <b>M</b> A <b>L</b> I <b>L</b> F <b>P</b> V <b>C</b> R <b>N</b> T <b>I</b> T <b>W</b>                        |     |     |     |     |     |
| 1. AtrbohF   | <b>W</b> I <b>M</b> I <b>M</b> I <b>G</b> L <b>F</b> L <b>W</b> K <b>F</b> F <b>O</b> Y <b>K</b> O <b>K</b> D <b>A</b> F <b>H</b> V <b>M</b> G <b>Y</b> C <b>L</b> L <b>T</b> A <b>K</b> G <b>A</b> E <b>T</b> L <b>K</b> F <b>N</b> M <b>A</b> L <b>I</b> L <b>F</b> P <b>V</b> C <b>R</b> N <b>T</b> I <b>T</b> W                               |     |     |     |     |     |
| 2. LesarbohF | <b>W</b> V <b>M</b> I <b>M</b> I <b>G</b> L <b>F</b> L <b>W</b> K <b>F</b> F <b>O</b> Y <b>K</b> O <b>K</b> D <b>A</b> F <b>H</b> V <b>M</b> G <b>Y</b> C <b>L</b> L <b>T</b> A <b>K</b> G <b>A</b> E <b>T</b> L <b>K</b> F <b>N</b> M <b>A</b> L <b>I</b> L <b>F</b> P <b>V</b> C <b>R</b> N <b>T</b> I <b>T</b> W                               |     |     |     |     |     |
| Consensus    | 460                                                                                                                                                                                                                                                                                                                                               | 470 | 480 | 490 | 500 | 510 |
| Identity     | <b>L</b> R <b>S</b> T <b>R</b> L <b>S</b> Y <b>F</b> V <b>P</b> F <b>D</b> D <b>N</b> I <b>N</b> F <b>H</b> K <b>T</b> I <b>A</b> G <b>A</b> I <b>V</b> V <b>X</b> V <b>I</b> L <b>H</b> <b>X</b> G <b>D</b> H <b>J</b> A <b>C</b> D <b>F</b> P <b>R</b> I <b>V</b> R <b>A</b> T <b>E</b> Y <b>D</b> Y <b>N</b> R <b>Y</b> L                      |     |     |     |     |     |
| 1. AtrbohF   | <b>L</b> R <b>S</b> T <b>R</b> L <b>S</b> Y <b>F</b> V <b>P</b> F <b>D</b> D <b>N</b> I <b>N</b> F <b>H</b> K <b>T</b> I <b>A</b> G <b>A</b> I <b>V</b> V <b>A</b> V <b>I</b> L <b>H</b> I <b>G</b> D <b>H</b> L <b>A</b> C <b>D</b> F <b>P</b> R <b>I</b> V <b>R</b> A <b>T</b> E <b>Y</b> D <b>Y</b> N <b>R</b> Y <b>L</b>                      |     |     |     |     |     |
| 2. LesarbohF | <b>L</b> R <b>S</b> T <b>R</b> L <b>S</b> Y <b>F</b> V <b>P</b> F <b>D</b> D <b>N</b> I <b>N</b> F <b>H</b> K <b>T</b> I <b>A</b> G <b>A</b> I <b>V</b> V <b>G</b> V <b>I</b> L <b>H</b> V <b>G</b> D <b>H</b> I <b>A</b> C <b>D</b> F <b>P</b> R <b>I</b> V <b>R</b> A <b>T</b> E <b>Y</b> D <b>Y</b> N <b>R</b> Y <b>L</b>                      |     |     |     |     |     |
| Consensus    | 520                                                                                                                                                                                                                                                                                                                                               | 530 | 540 | 550 | 560 | 570 |
| Identity     | <b>F</b> H <b>Y</b> F <b>O</b> T <b>K</b> O <b>P</b> T <b>Y</b> <b>X</b> D <b>L</b> V <b>K</b> G <b>P</b> E <b>G</b> I <b>T</b> G <b>I</b> L <b>M</b> V <b>I</b> L <b>M</b> <b>X</b> I <b>S</b> F <b>X</b> L <b>A</b> T <b>R</b> W <b>F</b> R <b>N</b> L <b>V</b> K <b>L</b> P <b>X</b> P <b>F</b> D <b>R</b> L <b>T</b> G                        |     |     |     |     |     |
| 1. AtrbohF   | <b>F</b> H <b>Y</b> F <b>O</b> T <b>K</b> O <b>P</b> T <b>Y</b> <b>F</b> D <b>L</b> V <b>K</b> G <b>P</b> E <b>G</b> I <b>T</b> G <b>I</b> L <b>M</b> V <b>I</b> L <b>M</b> I <b>S</b> F <b>T</b> L <b>A</b> T <b>R</b> W <b>F</b> R <b>N</b> L <b>V</b> K <b>L</b> P <b>K</b> P <b>F</b> D <b>R</b> L <b>T</b> G                                 |     |     |     |     |     |
| 2. LesarbohF | <b>F</b> H <b>Y</b> F <b>O</b> T <b>K</b> O <b>P</b> T <b>Y</b> <b>W</b> D <b>L</b> V <b>K</b> G <b>P</b> E <b>G</b> I <b>T</b> G <b>I</b> L <b>M</b> V <b>I</b> L <b>M</b> T <b>I</b> S <b>F</b> I <b>L</b> A <b>T</b> R <b>W</b> F <b>R</b> N <b>L</b> V <b>K</b> L <b>P</b> R <b>P</b> F <b>D</b> R <b>L</b> T <b>G</b>                        |     |     |     |     |     |
| Consensus    | 580                                                                                                                                                                                                                                                                                                                                               | 590 | 600 | 610 | 620 |     |
| Identity     | <b>F</b> N <b>A</b> F <b>W</b> Y <b>S</b> H <b>H</b> L <b>F</b> <b>X</b> I <b>V</b> Y <b>X</b> L <b>L</b> I <b>L</b> H <b>G</b> J <b>F</b> L <b>Y</b> F <b>A</b> K <b>P</b> W <b>Y</b> V <b>X</b> T <b>T</b> W <b>M</b> Y <b>L</b> A <b>V</b> P <b>V</b> L <b>L</b> Y <b>G</b> G <b>E</b> R <b>T</b> L <b>R</b> Y <b>F</b> R                      |     |     |     |     |     |
| 1. AtrbohF   | <b>F</b> N <b>A</b> F <b>W</b> Y <b>S</b> H <b>H</b> L <b>F</b> <b>V</b> I <b>V</b> Y <b>I</b> L <b>L</b> I <b>L</b> H <b>G</b> I <b>F</b> L <b>Y</b> F <b>A</b> K <b>P</b> W <b>Y</b> V <b>R</b> T <b>T</b> W <b>M</b> Y <b>L</b> A <b>V</b> P <b>V</b> L <b>L</b> Y <b>G</b> G <b>E</b> R <b>T</b> L <b>R</b> Y <b>F</b> R                      |     |     |     |     |     |
| 2. LesarbohF | <b>F</b> N <b>A</b> F <b>W</b> Y <b>S</b> H <b>H</b> L <b>F</b> <b>I</b> I <b>V</b> Y <b>V</b> L <b>L</b> I <b>L</b> H <b>G</b> I <b>F</b> L <b>Y</b> F <b>A</b> K <b>P</b> W <b>Y</b> V <b>H</b> T <b>T</b> W <b>M</b> Y <b>L</b> A <b>V</b> P <b>V</b> L <b>L</b> Y <b>G</b> G <b>E</b> R <b>T</b> L <b>R</b> Y <b>F</b> R                      |     |     |     |     |     |
| Consensus    | 630                                                                                                                                                                                                                                                                                                                                               | 640 | 650 | 660 | 670 | 680 |
| Identity     | <b>S</b> G <b>S</b> Y <b>S</b> V <b>R</b> L <b>L</b> K <b>V</b> A <b>I</b> Y <b>P</b> G <b>N</b> V <b>L</b> T <b>L</b> O <b>M</b> S <b>K</b> P <b>X</b> O <b>F</b> R <b>Y</b> K <b>S</b> G <b>O</b> Y <b>M</b> F <b>V</b> O <b>C</b> P <b>A</b> V <b>S</b> P <b>F</b> E <b>W</b> H <b>P</b> F <b>S</b> I <b>T</b> S <b>A</b>                      |     |     |     |     |     |
| 1. AtrbohF   | <b>S</b> G <b>S</b> Y <b>S</b> V <b>R</b> L <b>L</b> K <b>V</b> A <b>I</b> Y <b>P</b> G <b>N</b> V <b>L</b> T <b>L</b> O <b>M</b> S <b>K</b> P <b>T</b> O <b>F</b> R <b>Y</b> K <b>S</b> G <b>O</b> Y <b>M</b> F <b>V</b> O <b>C</b> P <b>A</b> V <b>S</b> P <b>F</b> E <b>W</b> H <b>P</b> F <b>S</b> I <b>T</b> S <b>A</b>                      |     |     |     |     |     |
| 2. LesarbohF | <b>S</b> G <b>S</b> Y <b>S</b> V <b>R</b> L <b>L</b> K <b>V</b> A <b>I</b> Y <b>P</b> G <b>N</b> V <b>L</b> T <b>L</b> O <b>M</b> S <b>K</b> P <b>S</b> O <b>F</b> R <b>Y</b> K <b>S</b> G <b>O</b> Y <b>M</b> F <b>V</b> O <b>C</b> P <b>A</b> V <b>S</b> P <b>F</b> E <b>W</b> H <b>P</b> F <b>S</b> I <b>T</b> S <b>A</b>                      |     |     |     |     |     |
| Consensus    | 690                                                                                                                                                                                                                                                                                                                                               | 700 | 710 | 720 | 730 | 740 |
| Identity     | <b>P</b> E <b>D</b> B <b>Y</b> I <b>S</b> I <b>H</b> I <b>R</b> <b>Z</b> L <b>G</b> D <b>W</b> T <b>O</b> E <b>L</b> K <b>X</b> <b>X</b> F <b>S</b> E <b>V</b> C <b>Z</b> P <b>P</b> V <b>X</b> G <b>K</b> S <b>G</b> L <b>L</b> R <b>A</b> D <b>E</b> <b>X</b> T <b>K</b> <b>X</b> S <b>L</b> P <b>K</b> L <b>L</b> I <b>D</b> G <b>P</b>        |     |     |     |     |     |
| 1. AtrbohF   | <b>P</b> E <b>D</b> D <b>Y</b> I <b>S</b> I <b>H</b> I <b>R</b> <b>Q</b> L <b>G</b> D <b>W</b> T <b>O</b> E <b>L</b> K <b>R</b> V <b>F</b> S <b>E</b> V <b>C</b> E <b>P</b> P <b>V</b> G <b>K</b> S <b>G</b> L <b>L</b> R <b>A</b> D <b>E</b> <b>T</b> T <b>K</b> <b>K</b> S <b>L</b> P <b>K</b> L <b>L</b> I <b>D</b> G <b>P</b>                 |     |     |     |     |     |
| 2. LesarbohF | <b>P</b> E <b>D</b> N <b>Y</b> I <b>S</b> I <b>H</b> I <b>R</b> <b>E</b> L <b>G</b> D <b>W</b> T <b>O</b> E <b>L</b> K <b>K</b> K <b>F</b> S <b>E</b> V <b>C</b> <b>Q</b> P <b>P</b> V <b>A</b> G <b>K</b> S <b>G</b> L <b>L</b> R <b>A</b> D <b>E</b> <b>S</b> T <b>K</b> <b>T</b> S <b>L</b> P <b>K</b> L <b>L</b> I <b>D</b> G <b>P</b>        |     |     |     |     |     |
| Consensus    | 750                                                                                                                                                                                                                                                                                                                                               | 760 | 770 | 780 | 790 |     |
| Identity     | <b>Y</b> G <b>A</b> P <b>A</b> O <b>D</b> Y <b>X</b> K <b>Y</b> D <b>V</b> L <b>L</b> L <b>V</b> G <b>L</b> G <b>I</b> G <b>A</b> T <b>P</b> F <b>I</b> S <b>I</b> L <b>K</b> D <b>L</b> L <b>N</b> N <b>I</b> V <b>K</b> M <b>E</b> E <b>H</b> A <b>D</b> S <b>I</b> S <b>D</b> F <b>S</b> R <b>S</b> S <b>E</b> <b>X</b> S                      |     |     |     |     |     |
| 1. AtrbohF   | <b>Y</b> G <b>A</b> P <b>A</b> O <b>D</b> Y <b>R</b> K <b>Y</b> D <b>V</b> L <b>L</b> L <b>V</b> G <b>L</b> G <b>I</b> G <b>A</b> T <b>P</b> F <b>I</b> S <b>I</b> L <b>K</b> D <b>L</b> L <b>N</b> N <b>I</b> V <b>K</b> M <b>E</b> E <b>H</b> A <b>D</b> S <b>I</b> S <b>D</b> F <b>S</b> R <b>S</b> S <b>E</b> Y <b>S</b>                      |     |     |     |     |     |
| 2. LesarbohF | <b>Y</b> G <b>A</b> P <b>A</b> O <b>D</b> Y <b>M</b> K <b>Y</b> D <b>V</b> L <b>L</b> L <b>V</b> G <b>L</b> G <b>I</b> G <b>A</b> T <b>P</b> F <b>I</b> S <b>I</b> L <b>K</b> D <b>L</b> L <b>N</b> N <b>I</b> V <b>K</b> M <b>E</b> E <b>H</b> A <b>D</b> S <b>I</b> S <b>D</b> F <b>S</b> R <b>S</b> S <b>E</b> H <b>S</b>                      |     |     |     |     |     |
| Consensus    | 800                                                                                                                                                                                                                                                                                                                                               | 810 | 820 | 830 | 840 | 850 |
| Identity     | <b>T</b> G <b>S</b> N <b>X</b> <b>X</b> T <b>P</b> R <b>R</b> K <b>X</b> I <b>L</b> L <b>K</b> T <b>T</b> N <b>A</b> Y <b>F</b> Y <b>W</b> V <b>T</b> R <b>E</b> O <b>G</b> S <b>F</b> D <b>W</b> F <b>K</b> G <b>V</b> M <b>N</b> E <b>V</b> A <b>E</b> L <b>D</b> O <b>R</b> G <b>V</b> I <b>E</b> M <b>H</b> N <b>Y</b> L <b>T</b>             |     |     |     |     |     |
| 1. AtrbohF   | <b>T</b> G <b>S</b> N <b>G</b> D <b>T</b> P <b>R</b> R <b>K</b> <b>R</b> I <b>L</b> L <b>K</b> T <b>T</b> N <b>A</b> Y <b>F</b> Y <b>W</b> V <b>T</b> R <b>E</b> O <b>G</b> S <b>F</b> D <b>W</b> F <b>K</b> G <b>V</b> M <b>N</b> E <b>V</b> A <b>E</b> L <b>D</b> O <b>R</b> G <b>V</b> I <b>E</b> M <b>H</b> N <b>Y</b> L <b>T</b>             |     |     |     |     |     |
| 2. LesarbohF | <b>T</b> G <b>S</b> N <b>S</b> E <b>T</b> P <b>R</b> R <b>K</b> <b>K</b> I <b>L</b> L <b>K</b> T <b>T</b> N <b>A</b> Y <b>F</b> Y <b>W</b> V <b>T</b> R <b>E</b> O <b>G</b> S <b>F</b> D <b>W</b> F <b>K</b> G <b>V</b> M <b>N</b> E <b>V</b> A <b>E</b> L <b>D</b> O <b>R</b> G <b>V</b> I <b>E</b> M <b>H</b> N <b>Y</b> L <b>T</b>             |     |     |     |     |     |
| Consensus    | 860                                                                                                                                                                                                                                                                                                                                               | 870 | 880 | 890 | 900 | 910 |
| Identity     | <b>S</b> V <b>Y</b> E <b>E</b> G <b>D</b> A <b>R</b> S <b>A</b> L <b>I</b> T <b>M</b> V <b>O</b> A <b>L</b> N <b>H</b> A <b>K</b> N <b>G</b> V <b>D</b> I <b>V</b> S <b>G</b> T <b>R</b> V <b>R</b> T <b>H</b> F <b>A</b> R <b>P</b> N <b>W</b> K <b>K</b> V <b>L</b> <b>X</b> K <b>L</b> S <b>S</b> K <b>H</b> <b>X</b> N <b>A</b>               |     |     |     |     |     |
| 1. AtrbohF   | <b>S</b> V <b>Y</b> E <b>E</b> G <b>D</b> A <b>R</b> S <b>A</b> L <b>I</b> T <b>M</b> V <b>O</b> A <b>L</b> N <b>H</b> A <b>K</b> N <b>G</b> V <b>D</b> I <b>V</b> S <b>G</b> T <b>R</b> V <b>R</b> T <b>H</b> F <b>A</b> R <b>P</b> N <b>W</b> K <b>K</b> V <b>L</b> T <b>K</b> L <b>S</b> S <b>K</b> H <b>C</b> N <b>A</b>                      |     |     |     |     |     |
| 2. LesarbohF | <b>S</b> V <b>Y</b> E <b>E</b> G <b>D</b> A <b>R</b> S <b>A</b> L <b>I</b> T <b>M</b> V <b>O</b> A <b>L</b> N <b>H</b> A <b>K</b> N <b>G</b> V <b>D</b> I <b>V</b> S <b>G</b> T <b>R</b> V <b>R</b> T <b>H</b> F <b>A</b> R <b>P</b> N <b>W</b> K <b>K</b> V <b>L</b> S <b>K</b> L <b>S</b> S <b>K</b> H <b>T</b> N <b>A</b>                      |     |     |     |     |     |
| Consensus    | 920                                                                                                                                                                                                                                                                                                                                               | 930 | 940 | 950 |     |     |
| Identity     | <b>R</b> I <b>G</b> V <b>F</b> Y <b>C</b> G <b>V</b> P <b>V</b> L <b>G</b> K <b>E</b> L <b>S</b> K <b>L</b> C <b>N</b> T <b>F</b> N <b>O</b> K <b>G</b> S <b>T</b> K <b>F</b> E <b>F</b> H <b>K</b> E <b>H</b> F                                                                                                                                  |     |     |     |     |     |
| 1. AtrbohF   | <b>R</b> I <b>G</b> V <b>F</b> Y <b>C</b> G <b>V</b> P <b>V</b> L <b>G</b> K <b>E</b> L <b>S</b> K <b>L</b> C <b>N</b> T <b>F</b> N <b>O</b> K <b>G</b> S <b>T</b> K <b>F</b> E <b>F</b> H <b>K</b> E <b>H</b> F                                                                                                                                  |     |     |     |     |     |
| 2. LesarbohF | <b>R</b> I <b>G</b> V <b>F</b> Y <b>C</b> G <b>V</b> P <b>V</b> L <b>G</b> K <b>E</b> L <b>S</b> K <b>L</b> C <b>N</b> T <b>F</b> N <b>O</b> K <b>G</b> S <b>T</b> K <b>F</b> E <b>F</b> H <b>K</b> E <b>H</b> F                                                                                                                                  |     |     |     |     |     |
